# Supplementary figures and images for: Risk factors for neck pain in college students: a systematic review and meta-analysis
Source: Research Square preprint supplement (doi:10.21203/rs.3.rs-2236117/v1), 2022-11-04

| 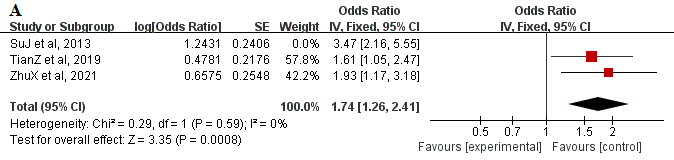 |
| --- |
| 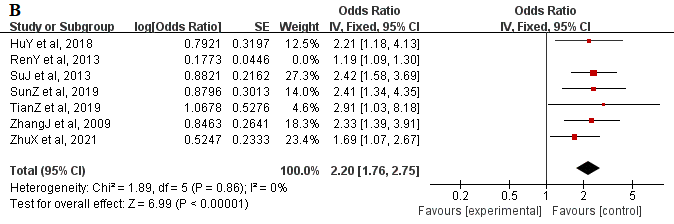 |
| 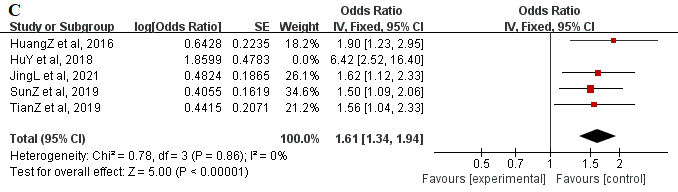 |
| A:Improper use of the pillow,B:Improper sitting posture,C:Staying up late |

Supplement: Supplementary file 1 [file 2e56fd9dd7b2adabee6bc50a.docx]
